# Supplementary material
Source: HighWire-hosted journal article supplement (https://innovations.bmj.com/highwire/filestream/137964/field_highwire_adjunct_files/0/bmjinnov-2020-000420supp001_data_supplement.pdf)

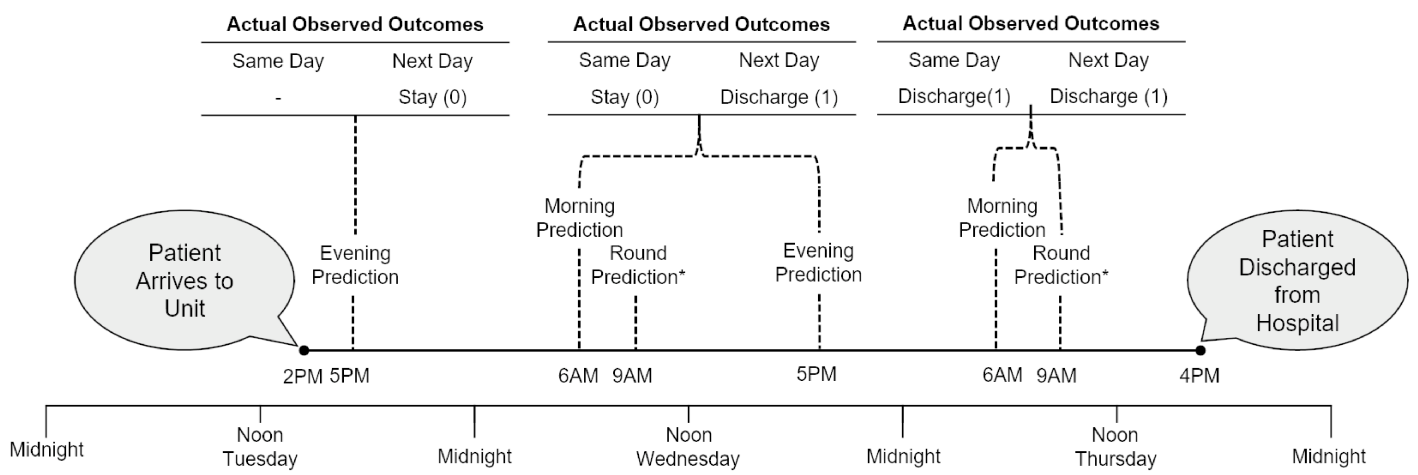

Supplement: bmjinnov-2020-000420supp001_data_supplement.pdf [file bmjinnov-2020-000420supp001_data_supplement.pdf]
